# Supplementary material for: Micellization and adsorption behaviour of bile salt systems
Source: Royal Society of Chemistry journal article supplement (doi:10.1039/c5ra20909a), 2015-12-03
Supplement: c5ra20909a1.pdf [file c5ra20909a1.pdf]

## Supporting Information

### **Micellization and adsorption behaviour of bile salt systems**

Bedachhanda Mukherjee<sup>a</sup>, Aijaz Ahmad Dar<sup>b, \*</sup>, Parvaiz Ahmad Bhat<sup>b</sup>, Satya. Priya. Moulik<sup>c</sup>, Akhil Ranjan Das<sup>a, \*</sup>

<sup>a</sup>*Polymer Science Unit, Indian Association for the Cultivation of Science, Jadavpur, Kolkata-700032, India.*

<sup>b</sup>*Department of Chemistry, University of Kashmir, Hazratbal, Srinagar-190006, J&K, India.*

<sup>c</sup>*Centre for Surface Science, Jadavpur University, Kolkata-700032, Jadavpur, India*

\*Email: [ardasiacs@yahoo.co.in](mailto:ardasiacs@yahoo.co.in); [aijaz\\_n5@yahoo.co.in](mailto:aijaz_n5@yahoo.co.in)

#### **Surface excess and minimum area per molecule of the single and mixed bile salt systems**

To calculate the amount of surfactant adsorbed per unit area at the air/aqueous solution interface for different systems, the Gibb's adsorption equation<sup>1</sup> has been utilized. For a binary and ternary combinations, Gibb's surface excess of surfactant relative to a zero excess of water per unit area of surfactant is given by the equation

$$d\gamma = \sum \Gamma_i RT d \ln a_i \quad (1)$$

where  $\gamma$ ,  $\Gamma_i$  and  $a_i$  denote surface tension, surface excess (adsorption density) and the activity of  $i$ th component in the mixed film respectively. For a constant composition of the ionic surfactant mixtures having concentration  $C_1$  of any one of the components, the equation<sup>2</sup> is

$$\Gamma = -\frac{1}{2.303RT} \left( \frac{d\gamma}{d \log C_1 + d \log \gamma_{\pm}} \right) \quad (2)$$

The maximum adsorption density ( $\Gamma_{\max}$ ) and the minimum area per surface active component ( $A_{\min}$ ) in angstrom units can be found from the relations

$$\Gamma_{\max} = -\frac{1}{2.303RT} \lim_{C_1 \rightarrow cmc} \left( \frac{d\gamma}{d \log C_1} \right) \quad (3)$$

$$A_{\min} = \frac{10^{18}}{N \Gamma_{\max}^{tot}} \quad (4)$$

where  $N$  is the Avogadro's number. Since dilute solutions of the surfactants were used, the  $d \log \gamma_{\pm}$  term was not considered in calculations.

### **Thermodynamics of micelle formation and adsorption at air/aqueous solution interface**

The free energy of micellization per mole of monomer unit,  $\Delta G_m^o$ , can be calculated by the equation,<sup>1,3</sup>

$$\Delta G_m^o = (1 + f)RT \ln cmc \quad (5)$$

where  $f$  is the fraction of counterions bound to the micelles and is determined as described in above section. The standard free energy of adsorption,<sup>1, 4</sup>  $\Delta G_{ad}^o$ , can be calculated using  $\Delta G_m^o$  by the relation

$$\Delta G_{ad}^o = \Delta G_m^o - (\pi_{cmc} / \Gamma_{max}) \quad (6)$$

where  $\pi_{cmc}$  is the surface pressure at cmc ( $\pi_{cmc} = \gamma_{cmc} - \gamma_o$ ,  $\gamma_o$  and  $\gamma_{cmc}$  being surface tension of water and that of a given surfactant system at its cmc respectively).

For a complete thermodynamic analysis  $\Delta H_m^o$  is required along with  $\Delta G_m^o$ . The temperature effect on cmc can be used to estimate  $\Delta H_m^o$  assuming aggregation number as well as the counterion binding to be independent of temperature.  $\Delta G_m^o$  can be obtained from the equation

$$\Delta G = -RT \ln CMC \quad (7)$$

where,  $R$  is the Universal Gas constant and  $T$  is the absolute temperature.

$$\Delta H_m^o = -RT^2 \frac{d \ln CMC}{dT} \quad (8)$$

where  $\frac{d \ln CMC}{dT}$  at each temperature can be calculated using the plot of  $\ln CMC$  versus  $T$  and represents change in logarithm of cmc as a result of a small increment in temperature. Therefore, the entropy of micellization,  $\Delta S_m^0$  follows from the Gibb's relationship

$$\Delta G_m^0 = \Delta H_m^0 - T\Delta S_m^0 \quad (9)$$

**Table 1s**

Critical micelle concentration, cmc, degree of counterion binding,  $f$ , maximum surface excess,  $\Gamma_{\text{Max}}$ , minimum area per molecule,  $A_{\text{min}}$ , and  $I_1/I_3$  values of pure bile salts at different temperatures.

| System | $T$ (°C) | $f$  | cmc (mM) (S.T) | cmc (mM) (Cond) | $\Gamma_{\text{Max}}/10^{-6}$ (mol m <sup>-2</sup> ) | $A_{\text{min}}$ (nm <sup>2</sup> ) | $I_1/I_3$ |
|--------|----------|------|----------------|-----------------|------------------------------------------------------|-------------------------------------|-----------|
| NaC    | 10       | 0.06 | 10.8           | 12.5            | 2.45                                                 | 0.68                                | 0.86      |
|        | 20       | 0.08 | 7.78           | 8.25            | 2.58                                                 | 0.64                                | 0.88      |
|        | 30       | 0.09 | 5.89           | 7.35            | 2.27                                                 | 0.73                                | 0.92      |
|        | 40       | 0.08 | 6.10           | 7.50            | 2.45                                                 | 0.68                                | 0.96      |
| NaTC   | 10       | 0.09 | 6.79           | 7.92            | 1.64                                                 | 1.01                                | 0.94      |
|        | 20       | 0.06 | 6.68           | 7.30            | 1.78                                                 | 0.93                                | 0.94      |
|        | 30       | 0.07 | 6.14           | 6.81            | 1.61                                                 | 1.03                                | 0.97      |
|        | 40       | 0.09 | 6.36           | 7.20            | 1.88                                                 | 0.88                                | 1.01      |
| NaDC   | 10       | 0.12 | 4.65           | 5.82            | 1.19                                                 | 1.40                                | 0.70      |
|        | 20       | 0.16 | 3.80           | 5.36            | 1.13                                                 | 1.47                                | 0.69      |
|        | 30       | 0.18 | 3.02           | 4.05            | 1.17                                                 | 1.42                                | 0.71      |
|        | 40       | 0.18 | 3.16           | 4.32            | 1.25                                                 | 1.33                                | 0.73      |
| NaTDC  | 10       | 0.11 | 2.01           | 2.21            | 3.30                                                 | 0.50                                | 0.71      |
|        | 20       | 0.1  | 1.88           | 2.62            | 3.17                                                 | 0.52                                | 0.71      |
|        | 30       | 0.09 | 2.43           | 2.90            | 3.26                                                 | 0.51                                | 0.72      |
|        | 40       | 0.08 | 2.88           | 3.50            | 2.82                                                 | 0.59                                | 0.75      |

S.T. Stands for Surface Tension and Cond. for Conductance. The aggregation number of all the bile salts was found to be between 5-17 at 20 °C and found to be slightly temperature dependent. Error in the measurement of cmc was < 0.5%.

**Table 2s**

Critical micelle concentration,  $C_{\text{mix}}$  (experimental) and  $^{\text{ideal}}C_{\text{mix}}$ , maximum surface excess,  $\Gamma_{\text{Max}}$ , minimum area per molecule,  $A_{\text{min}}$  (experimental) and  $^{\text{ideal}}A_{\text{min}}$  and  $I_1/I_3$  values for equimolar binary bile salt systems at different temperatures.

| System     | $T$ (°C) | $C_{\text{mix}}$ (mM) | $^{\text{ideal}}C_{\text{mix}}$ (mM) | $\Gamma_{\text{Max}}/10^{-6}$<br>(mol m <sup>-2</sup> ) | $A_{\text{min}}$<br>(nm <sup>2</sup> ) | $^{\text{ideal}}A_{\text{min}}$<br>(nm <sup>2</sup> ) | $I_1/I_3$ |
|------------|----------|-----------------------|--------------------------------------|---------------------------------------------------------|----------------------------------------|-------------------------------------------------------|-----------|
| NaDC-NaTC  | 10       | 5.95                  | 5.52                                 | 1.26                                                    | 1.32                                   | 1.20                                                  | 0.72      |
|            | 20       | 3.92                  | 4.84                                 | 1.37                                                    | 1.21                                   | 1.20                                                  | 0.75      |
|            | 30       | 4.75                  | 4.05                                 | 1.56                                                    | 1.06                                   | 1.23                                                  | 0.76      |
|            | 40       | 4.83                  | 4.22                                 | 1.16                                                    | 1.43                                   | 1.11                                                  | 0.79      |
| NaTC-NaTDC | 10       | 2.77                  | 3.10                                 | 2.26                                                    | 0.74                                   | 0.76                                                  | 0.75      |
|            | 20       | 1.73                  | 2.93                                 | 2.73                                                    | 0.61                                   | 0.73                                                  | 0.77      |
|            | 30       | 1.59                  | 3.48                                 | 2.80                                                    | 0.59                                   | 0.77                                                  | 0.78      |
|            | 40       | 2.29                  | 3.96                                 | 2.08                                                    | 0.80                                   | 0.74                                                  | 0.81      |
| NaTDC-NaDC | 10       | 2.96                  | 2.81                                 | 2.13                                                    | 0.78                                   | 0.95                                                  | 0.70      |
|            | 20       | 2.92                  | 2.52                                 | 2.19                                                    | 0.76                                   | 1.00                                                  | 0.72      |
|            | 30       | 2.63                  | 2.69                                 | 1.59                                                    | 1.04                                   | 0.96                                                  | 0.73      |
|            | 40       | 2.29                  | 3.01                                 | 1.47                                                    | 1.13                                   | 0.96                                                  | 0.74      |
| NaC-NaDC   | 10       | 4.40                  | 6.50                                 | 1.37                                                    | 1.21                                   | 1.04                                                  | 0.71      |
|            | 20       | 3.72                  | 5.11                                 | 1.48                                                    | 1.12                                   | 1.06                                                  | 0.73      |
|            | 30       | 3.96                  | 3.99                                 | 1.60                                                    | 1.04                                   | 1.08                                                  | 0.75      |
|            | 40       | 4.97                  | 4.16                                 | 1.35                                                    | 1.23                                   | 1.00                                                  | 0.77      |
| NaC-NaTC   | 10       | 9.22                  | 8.32                                 | 1.77                                                    | 0.94                                   | 0.85                                                  | 0.88      |
|            | 20       | 8.95                  | 7.19                                 | 2.14                                                    | 0.78                                   | 0.79                                                  | 0.91      |
|            | 30       | 8.00                  | 6.01                                 | 2.73                                                    | 0.61                                   | 0.88                                                  | 0.93      |
|            | 40       | 6.68                  | 6.23                                 | 2.00                                                    | 0.83                                   | 0.78                                                  | 0.97      |
| NaC-NaTDC  | 10       | 2.96                  | 3.39                                 | 2.48                                                    | 0.67                                   | 0.59                                                  | 0.73      |
|            | 20       | 2.75                  | 3.03                                 | 2.54                                                    | 0.65                                   | 0.58                                                  | 0.76      |
|            | 30       | 1.97                  | 3.44                                 | 2.41                                                    | 0.69                                   | 0.62                                                  | 0.77      |
|            | 40       | 2.60                  | 3.91                                 | 2.54                                                    | 0.65                                   | 0.63                                                  | 0.80      |

**Table 3s**

Critical micelle concentration,  $C_{\text{mix}}$  (experimental) and  $^{\text{ideal}}C_{\text{mix}}$ , maximum surface excess,  $\Gamma_{\text{Max}}$ , minimum area per molecule,  $A_{\text{min}}$  (experimental) and  $^{\text{ideal}}A_{\text{min}}$  and  $I_1/I_3$  values for equimolar ternary bile salt systems at different temperatures.

| System          | $T$ (°C) | $C_{\text{mix}}$ (mM) | $^{\text{ideal}}C_{\text{mix}}$ (mM) | $\Gamma_{\text{Max}}/10^{-6}$ (mol m <sup>-2</sup> ) | $A_{\text{min}}$ (nm <sup>2</sup> ) | $^{\text{ideal}}A_{\text{min}}$ (nm <sup>2</sup> ) | $I_1/I_3$ |
|-----------------|----------|-----------------------|--------------------------------------|------------------------------------------------------|-------------------------------------|----------------------------------------------------|-----------|
| NaTC-NaDC-NaTDC | 10       | 3.85                  | 3.31                                 | 1.58                                                 | 1.05                                | 0.97                                               | 0.72      |
|                 | 20       | 3.32                  | 3.56                                 | 1.83                                                 | 0.91                                | 0.97                                               | 0.75      |
|                 | 30       | 3.20                  | 3.36                                 | 1.85                                                 | 0.90                                | 0.99                                               | 0.76      |
|                 | 40       | 2.65                  | 3.53                                 | 1.83                                                 | 0.91                                | 0.93                                               | 0.77      |
| NaTC-NaDC-NaC   | 10       | 6.25                  | 5.99                                 | 1.97                                                 | 0.84                                | 1.03                                               | 0.75      |
|                 | 20       | 6.03                  | 5.54                                 | 2.09                                                 | 0.79                                | 1.01                                               | 0.79      |
|                 | 30       | 5.20                  | 4.52                                 | 2.07                                                 | 0.80                                | 1.06                                               | 0.81      |
|                 | 40       | 4.74                  | 4.19                                 | 1.42                                                 | 1.17                                | 0.96                                               | 0.83      |
| NaTDC-NaDC-NaC  | 10       | 4.15                  | 3.73                                 | 1.63                                                 | 1.02                                | 0.86                                               | 0.72      |
|                 | 20       | 3.51                  | 3.65                                 | 1.79                                                 | 0.93                                | 0.88                                               | 0.74      |
|                 | 30       | 3.32                  | 3.33                                 | 1.73                                                 | 0.96                                | 0.89                                               | 0.76      |
|                 | 40       | 2.96                  | 3.43                                 | 1.82                                                 | 0.91                                | 0.86                                               | 0.78      |
| NaTC-NaTDC-NaC  | 10       | 1.50                  | 3.83                                 | 2.43                                                 | 0.68                                | 0.73                                               | 0.78      |
|                 | 20       | 1.49                  | 4.24                                 | 2.80                                                 | 0.59                                | 0.70                                               | 0.81      |
|                 | 30       | 1.47                  | 4.10                                 | 2.53                                                 | 0.66                                | 0.76                                               | 0.83      |
|                 | 40       | 1.17                  | 4.02                                 | 2.73                                                 | 0.61                                | 0.72                                               | 0.85      |

**Table 4s**

$\Delta G_m^0$ ,  $\Delta H_m^0$ ,  $\Delta S_m^0$ ,  $\Delta G_{ad}^0$  and  $\pi_{cmc}$  values for pure and equimolar binary and ternary bile salt systems at different temperatures.

| System     | $T$ (°C) | $\Delta G_m^0$<br>(kJ mol <sup>-1</sup> ) | $\Delta H_m^0$<br>(kJ mol <sup>-1</sup> ) | $\Delta S_m^0$<br>(JK <sup>-1</sup> mol <sup>-1</sup> ) | $\pi_{cmc}$<br>(mN/m) | $\Delta G_{ad}^0$<br>(kJmol <sup>-1</sup> ) |
|------------|----------|-------------------------------------------|-------------------------------------------|---------------------------------------------------------|-----------------------|---------------------------------------------|
| NaC        | 10       | -10.7                                     | 21.6                                      | 114.1                                                   | 29.4                  | -22.7                                       |
|            | 20       | -11.8                                     | 21.6                                      | 113.9                                                   | 30.6                  | -23.7                                       |
|            | 30       | -12.9                                     | 8.3                                       | 73.4                                                    | 31.8                  | -27.0                                       |
|            | 40       | -13.3                                     | -2.9                                      | 33.2                                                    | 33.9                  | -27.1                                       |
| NaTC       | 10       | -11.8                                     | 1.1                                       | 45.2                                                    | 27.8                  | -28.7                                       |
|            | 20       | -12.2                                     | 3.6                                       | 53.9                                                    | 24.3                  | -25.9                                       |
|            | 30       | -12.8                                     | 1.9                                       | 48.6                                                    | 27.1                  | -29.7                                       |
|            | 40       | -13.2                                     | -2.9                                      | 32.7                                                    | 24.0                  | -25.9                                       |
| NaDC       | 10       | -12.6                                     | 13.4                                      | 91.8                                                    | 27.7                  | -35.9                                       |
|            | 20       | -13.6                                     | 15.4                                      | 98.8                                                    | 26.8                  | -37.3                                       |
|            | 30       | -14.6                                     | 7.1                                       | 71.5                                                    | 26.2                  | -37.0                                       |
|            | 40       | -15.0                                     | -3.8                                      | 35.9                                                    | 25.9                  | -35.7                                       |
| NaTDC      | 10       | -14.6                                     | 4.3                                       | 66.8                                                    | 27.6                  | -23.0                                       |
|            | 20       | -15.3                                     | -6.9                                      | 28.8                                                    | 27.3                  | -23.9                                       |
|            | 30       | -15.2                                     | -16.3                                     | -3.9                                                    | 27.0                  | -23.5                                       |
|            | 40       | -15.2                                     | -14.0                                     | 4.0                                                     | 23.7                  | -23.6                                       |
| NaDC-NaTC  | 10       | -12.1                                     | 27.8                                      | 140.9                                                   | 28.8                  | -34.9                                       |
|            | 20       | -13.5                                     | 8.0                                       | 73.5                                                    | 28.4                  | -34.2                                       |
|            | 30       | -13.5                                     | -8.0                                      | 18.1                                                    | 27.7                  | -31.2                                       |
|            | 40       | -13.9                                     | -1.4                                      | 10.0                                                    | 27.4                  | -37.5                                       |
| NaTC-NaTDC | 10       | -13.9                                     | 31.5                                      | 130.0                                                   | 29.3                  | -26.8                                       |
|            | 20       | -15.5                                     | 19.9                                      | 120.8                                                   | 27.8                  | -25.7                                       |
|            | 30       | -16.2                                     | -10.7                                     | 18.2                                                    | 26.2                  | -25.6                                       |
|            | 40       | -15.8                                     | -29.8                                     | -44.7                                                   | 27.4                  | -29.0                                       |
| NaTDC-NaDC | 10       | -13.7                                     | 1.1                                       | 52.2                                                    | 28.7                  | -27.2                                       |
|            | 20       | -14.2                                     | 4.3                                       | 63.1                                                    | 29.5                  | -27.7                                       |
|            | 30       | -15.0                                     | 9.2                                       | 79.8                                                    | 28.3                  | -32.8                                       |
|            | 40       | -15.8                                     | 11.3                                      | 86.5                                                    | 25.7                  | -33.3                                       |

|                 |    |       |       |       |      |       |
|-----------------|----|-------|-------|-------|------|-------|
| NaC-NaDC        | 10 | -12.8 | 11.0  | 84.1  | 29.8 | -34.5 |
|                 | 20 | -13.6 | 3.7   | 59.1  | 28.7 | -33.0 |
|                 | 30 | -13.9 | -11.0 | 9.7   | 29.1 | -32.1 |
|                 | 40 | -13.8 | -18.4 | -14.6 | 28.4 | -34.8 |
| NaC-NaTC        | 10 | -11.0 | 2.0   | 42.8  | 29.2 | -27.5 |
|                 | 20 | -11.5 | 5.1   | 56.5  | 30.4 | -25.7 |
|                 | 30 | -12.2 | 11.2  | 77.0  | 29.9 | -23.1 |
|                 | 40 | -13.0 | 14.6  | 88.4  | 27.4 | -26.7 |
| NaC-NaTDC       | 10 | -13.7 | 4.9   | 65.7  | 29.7 | -25.7 |
|                 | 20 | -14.4 | 14.6  | 98.9  | 29.3 | -25.9 |
|                 | 30 | -15.7 | 2.2   | 59.0  | 28.0 | -27.3 |
|                 | 40 | -15.5 | -22.7 | 23.1  | 27.3 | -26.2 |
| NaTC-NaDC-NaTDC | 10 | -13.1 | 10.0  | 81.5  | 29.6 | -31.9 |
|                 | 20 | -13.9 | 6.7   | 70.2  | 28.5 | -29.5 |
|                 | 30 | -14.5 | 8.5   | 75.9  | 27.7 | -29.4 |
|                 | 40 | -15.4 | 15.2  | 97.9  | 26.9 | -30.1 |
| NaTC-NaDC-NaC   | 10 | -11.9 | 2.4   | 56.9  | 29.9 | -27.1 |
|                 | 20 | -12.5 | 6.6   | 61.4  | 29.0 | -26.3 |
|                 | 30 | -13.3 | 9.2   | 65.6  | 28.2 | -26.9 |
|                 | 40 | -13.9 | 7.6   | 59.7  | 27.1 | -33.0 |
| NaTDC-NaDC-NaC  | 10 | -12.9 | 11.1  | 84.7  | 29.9 | -31.3 |
|                 | 20 | -13.8 | 8.0   | 74.2  | 29.8 | -30.4 |
|                 | 30 | -14.4 | 6.5   | 68.8  | 29.1 | -31.2 |
|                 | 40 | -15.2 | 9.1   | 77.5  | 27.3 | -30.1 |
| NaTC-NaTDC-NaC  | 10 | -15.3 | 0.2   | 54.6  | 28.7 | -27.1 |
|                 | 20 | -15.9 | 0.6   | 56.1  | 28.1 | -25.9 |
|                 | 30 | -16.4 | 9.3   | 84.7  | 28.1 | -27.6 |
|                 | 40 | -17.6 | 18.6  | 115.6 | 24.0 | -26.4 |

---



**Table 5s**

Micellar mole fraction,  $X_1$ , interaction parameter,  $\beta$ , activity coefficients,  $g_1$  and  $g_2$  of two components for equimolar ternary bile salt systems according to Rubingh's pseudobinary treatment at different temperatures.

| System            | $T$ (°C) | $X_1$  | $\beta$ | $g_1$  | $g_2$ |
|-------------------|----------|--------|---------|--------|-------|
| NaTDC-(NaTC-NaDC) | 10       | 0.188  | 1.86    | 3.408  | 1.068 |
|                   | 20       | 0.303  | 0.92    | 1.567  | 1.089 |
|                   | 30       | 0.233  | 1.03    | 1.828  | 1.057 |
|                   | 40       | 0.246  | 0.39    | 1.250  | 1.024 |
| NaTC-(NaDC-NaTDC) | 10       | 0.147  | 0.72    | 1.690  | 1.016 |
|                   | 20       | 0.223  | -0.49   | 0.743  | 0.976 |
|                   | 30       | 0.186  | -0.10   | 0.933  | 0.996 |
|                   | 40       | 0.213  | -0.41   | 0.777  | 0.982 |
| NaDC-(NaTC-NaTDC) | 10       | 0.0824 | 1.44    | 3.3584 | 1.01  |
|                   | 20       | 0.131  | 1.06    | 2.224  | 1.018 |
|                   | 30       | 0.142  | 1.24    | 2.481  | 1.025 |
|                   | 40       | 0.239  | 0.27    | 1.170  | 1.016 |
| NaTC-(NaDC-NaC)   | 10       | 0.344  | 0.67    | 1.336  | 1.083 |
|                   | 20       | 0.056  | 1.89    | 5.400  | 1.006 |
|                   | 30       | 0.141  | 0.94    | 1.997  | 1.019 |
|                   | 40       | 0.454  | -0.66   | 0.822  | 0.873 |
| NaC-(NaDC-NaTC)   | 10       | 0.268  | -0.61   | 0.722  | 0.957 |
|                   | 20       | 0.036  | 2.08    | 6.914  | 1.003 |
|                   | 30       | 0.131  | 1.07    | 2.245  | 1.019 |
|                   | 40       | 0.454  | -0.52   | 0.856  | 0.898 |
| NaDC-(NaC-NaTC)   | 10       | 0.668  | 0.05    | 1.005  | 1.022 |
|                   | 20       | 0.539  | -0.09   | 0.981  | 0.974 |

|                  |    |       |       |       |       |
|------------------|----|-------|-------|-------|-------|
|                  | 30 | 0.571 | 0.03  | 1.006 | 1.010 |
|                  | 40 | 0.513 | -0.12 | 0.973 | 0.970 |
| NaDC-(NaTDC-NaC) | 10 | 0.076 | 1.59  | 3.892 | 1.009 |
|                  | 20 | 0.171 | 0.86  | 1.800 | 1.025 |
|                  | 30 | 0.206 | 0.35  | 1.602 | 1.023 |
|                  | 40 | 0.257 | 0.35  | 1.214 | 1.024 |
| NaTDC-(NaDC-NaC) | 10 | 0.551 | 1.11  | 1.251 | 1.401 |
|                  | 20 | 0.426 | 0.50  | 1.180 | 1.095 |
|                  | 30 | 0.442 | 0.00  | 1.000 | 1.000 |
|                  | 40 | 0.477 | -1.20 | 0.719 | 0.761 |
| NaC-(NaDC-NaTDC) | 10 | 0.071 | 0.69  | 1.807 | 1.003 |
|                  | 20 | 0.188 | -0.34 | 0.800 | 0.988 |
|                  | 30 | 0.164 | 0.19  | 1.145 | 1.005 |
|                  | 40 | 0.320 | -0.63 | 0.748 | 0.938 |
| NaTDC-(NaTC-NaC) | 10 | 0.630 | -3.82 | 0.592 | 0.220 |
|                  | 20 | 0.549 | -4.64 | 0.389 | 0.247 |
|                  | 30 | 0.535 | -4.65 | 0.367 | 0.264 |
|                  | 40 | 0.510 | -5.52 | 0.266 | 0.238 |
| NaC-(NaTDC-NaTC) | 10 | 0.351 | -4.80 | 0.132 | 0.554 |
|                  | 20 | 0.280 | -2.85 | 0.228 | 0.799 |
|                  | 30 | 0.272 | -2.23 | 0.307 | 0.848 |
|                  | 40 | 0.425 | -4.50 | 0.226 | 0.444 |
| NaTC-(NaTDC-NaC) | 10 | 0.434 | -4.27 | 0.255 | 0.448 |
|                  | 20 | 0.370 | -4.05 | 0.201 | 0.574 |
|                  | 30 | 0.321 | -3.01 | 0.249 | 0.734 |
|                  | 40 | 0.435 | -4.86 | 0.212 | 0.399 |

Subscript 1 refers to Bile Salt Component Outside Parentheses while 2 for Two Bile Salts in Parentheses Treated as Single Component.

**Table 6s**

Micellar mole fraction,  $X_1$ , interaction parameter,  $\beta$ , activity coefficients,  $g_1$  and  $g_2$  of two components for equimolar binary bile salt systems according to Rubingh's formulation at different temperatures.

| System     | $T$ (°C) | $X_1$ | $\beta$ | $g_1$ | $g_2$ |
|------------|----------|-------|---------|-------|-------|
| NaDC-NaTC  | 10       | 0.610 | 0.31    | 1.049 | 1.124 |
|            | 20       | 0.596 | -0.90   | 0.864 | 0.726 |
|            | 30       | 0.749 | 0.77    | 1.050 | 1.544 |
|            | 40       | 0.729 | 0.64    | 1.048 | 1.405 |
| NaTC-NaTDC | 10       | 0.278 | -0.60   | 0.733 | 0.955 |
|            | 20       | 0.397 | -3.08   | 0.326 | 0.616 |
|            | 30       | 0.418 | -3.46   | 0.309 | 0.546 |
|            | 40       | 0.410 | -2.36   | 0.440 | 0.673 |
| NaTDC:NaDC | 10       | 0.724 | 0.28    | 1.021 | 1.156 |
|            | 20       | 0.740 | 0.71    | 1.006 | 1.017 |
|            | 30       | 0.544 | -0.16   | 0.968 | 0.954 |
|            | 40       | 0.515 | -1.10   | 0.771 | 0.747 |
| NaC-NaDC   | 10       | 0.388 | -1.71   | 0.526 | 0.773 |
|            | 20       | 0.394 | -1.36   | 0.607 | 0.809 |
|            | 30       | 0.341 | -0.03   | 0.986 | 0.996 |
|            | 40       | 0.256 | 0.84    | 1.593 | 1.057 |
| NaC-NaTC   | 10       | 0.358 | 0.43    | 1.194 | 1.057 |
|            | 20       | 0.432 | 0.89    | 1.330 | 1.180 |
|            | 30       | 0.524 | 1.14    | 1.296 | 1.369 |
|            | 40       | 0.512 | 0.28    | 1.070 | 1.077 |
| NaC-NaTDC  | 10       | 0.228 | -0.84   | 0.605 | 0.957 |
|            | 20       | 0.244 | -0.56   | 0.549 | 0.873 |

|    |       |       |       |       |
|----|-------|-------|-------|-------|
| 30 | 0.406 | -2.51 | 0.412 | 0.662 |
| 40 | 0.401 | -1.76 | 0.532 | 0.753 |

Subscript 1 refers to First Bile Salt in Each System.

**Table 7s**

Critical micelle concentration:  $C_{\text{mix}}$  (experimental),  $^{\text{ideal}}C_{\text{mix}}$  and  $^{\text{RH}}C_{\text{mix}}$ , micellar mole fraction,  $X_i$ , activity coefficients,  $g_i$ , for equimolar ternary bile salt systems according to Rubingh-Holland treatment at different temperatures.

| System                   | $T$<br>(°C) | $C_{\text{mix}}$ (mM)<br>(S.T) | $^{\text{ideal}}C_{\text{mix}}$<br>(mM) | $^{\text{RH}}C_{\text{mix}}$<br>(mM) | $X_1$ | $X_2$ | $X_3$ | $g_1$ | $g_2$ | $g_3$ |
|--------------------------|-------------|--------------------------------|-----------------------------------------|--------------------------------------|-------|-------|-------|-------|-------|-------|
| NaTC(1):NaDC(2):NaTDC(3) | 10          | 3.85                           | 3.31                                    | 3.46                                 | 0.225 | 0.183 | 0.591 | 0.986 | 1.355 | 0.9   |
|                          | 20          | 3.32                           | 3.56                                    | 2.24                                 | 0.342 | 0.146 | 0.511 | 0.325 | 1.343 | 0.6   |
|                          | 30          | 3.20                           | 3.36                                    | 2.16                                 | 0.362 | 0.102 | 0.536 | 0.325 | 2.334 | 0.5   |
|                          | 40          | 2.65                           | 3.53                                    | 2.59                                 | 0.248 | 0.269 | 0.483 | 0.651 | 1.017 | 0.6   |
| NaTC(1):NaDC(2):NaC(3)   | 10          | 6.25                           | 5.99                                    | 4.80                                 | 0.299 | 0.364 | 0.337 | 1.030 | 0.945 | 0.4   |
|                          | 20          | 6.03                           | 5.54                                    | 4.41                                 | 0.224 | 0.526 | 0.251 | 0.985 | 0.735 | 0.7   |
|                          | 30          | 5.20                           | 4.52                                    | 5.18                                 | 0.146 | 0.573 | 0.281 | 1.933 | 0.997 | 1.0   |
|                          | 40          | 4.74                           | 4.19                                    | 5.88                                 | 0.244 | 0.525 | 0.232 | 1.502 | 1.181 | 1.7   |
| NaTDC(1):NaDC(2):NaC(3)  | 10          | 4.15                           | 3.73                                    | 3.33                                 | 0.529 | 0.256 | 0.215 | 1.043 | 0.933 | 0.4   |
|                          | 20          | 3.51                           | 3.65                                    | 2.95                                 | 0.456 | 0.282 | 0.262 | 0.924 | 0.918 | 0.4   |
|                          | 30          | 3.32                           | 3.33                                    | 2.42                                 | 0.490 | 0.195 | 0.315 | 0.659 | 1.373 | 0.4   |
|                          | 40          | 2.96                           | 3.43                                    | 2.79                                 | 0.480 | 0.313 | 0.206 | 0.672 | 0.938 | 0.9   |
| NaTC(1):NaTDC(2):NaC(3)  | 10          | 1.50                           | 3.83                                    | 3.22                                 | 0.260 | 0.544 | 0.196 | 0.798 | 0.982 | 0.5   |
|                          | 20          | 1.49                           | 4.24                                    | 2.39                                 | 0.341 | 0.574 | 0.084 | 0.350 | 0.595 | 1.2   |
|                          | 30          | 1.47                           | 4.10                                    | 2.04                                 | 0.298 | 0.546 | 0.156 | 0.372 | 0.497 | 0.7   |
|                          | 40          | 1.17                           | 4.02                                    | 2.82                                 | 0.282 | 0.522 | 0.197 | 0.623 | 0.626 | 1.0   |

## References

- [1] S. Pal, A. R. Das and S. P. Moulik, *Indian J. Biochem. Biophys.*, 1982, **19**, 195-200.

- [2] P. K. Jana and S. P. Moulik, *J. Phys. Chem.*, 1991, **95**, 9525-9532.
- [3] P. Mukherjee, *Adv. Colloid Interface Sci.*, 1967, **1**, 241-275.
- [4] C. J. Drummond, C. G. Warr, F. Grieser, B. W. Ninham and D. F. Evans, *J. Phys. Chem.*, 1985, **89**, 2103-2109.
